# Supplementary material for: Defect engineering in conjugated polyimides for promoting visible-light-driven photocatalytic benzylamine oxidation
Source: Royal Society of Chemistry journal article supplement (doi:10.1039/d2nj05574k), 2022-12-22
Supplement: d2nj05574k1.pdf [file d2nj05574k1.pdf]

## Supporting Information

### Defect engineering in conjugated polyimide for promoting visible-light-driven photocatalytic benzylamine oxidation

*Xin Wang,* <sup>+, a</sup> *Cong Wang,* <sup>+, c</sup> *Le-Heng Chen,* <sup>a</sup> *Hua-Qiao Tan,* <sup>\*, b</sup> *Yan-Mei Xing,* <sup>b</sup>  
*Hui-Ying Sun,* <sup>b</sup> *Ying-Nan Zhao,* <sup>b</sup> and *Dong-En Zhang* <sup>a</sup>

Dr. X. Wang<sup>a</sup>, [+] Dr. C. Wang<sup>c</sup>, [+] Prof. H-Q. Tan<sup>b</sup>, Dr. Y-M. Xing<sup>b</sup>, Dr. H-Y. Sun<sup>b</sup>,  
Dr. Y-N. Zhao<sup>b</sup>, Prof. D-E Zhang<sup>a</sup>

<sup>a</sup> School of Environmental and Chemical Engineering, Jiangsu Ocean University,  
Lianyungang, 222000 (China)

Prof. H-Q. Tan

<sup>b</sup> Key Laboratory of Polyoxometalate and Reticular Material Chemistry of Ministry of  
Education, Faculty of Chemistry, Northeast Normal University, Changchun, 130024  
(China)

Dr. C. Wang

<sup>c</sup> School of Materials Science and Engineering, Changchun University of Science and  
Technology, Changchun, 130022 (China)

E-mail: tanhq870@nenu.edu.cn

[+] These authors contributed equally to this work.

#### **This File Includes:**

Materials

Preparation of PI

Characterizations

---

Electrochemical Analysis

Photocatalysis for selective aerobic oxidation of benzylamine

Photocatalytic hydrogen production

Fig. S1 to S14

Tables S1 to S4

**Materials.** Melamine (MA), Pyromellitic anhydride (PD), NaHCO<sub>3</sub>, Isopropanol (IPA), Triethanolamine (TEOA)  $\beta$ -Carotene, Methanol, Acetonitrile, Superoxide dismutase (SOD), Hydrochloric acid (HCl) were purchased from Aladdin Chemical Co., Ltd., China. The purity of all reagents is analytical (AR) and not further purified.

**Preparation of PI.** 0.84 g (6.7 mmol) of MA and 2.18 g (10 mmol) of PD were ground in an agate mortar until homogeneous. The mixture was transferred to a covered corundum crucible (semi-closed system) and heated to 325 °C at a heating rate of 7 °C min<sup>-1</sup> for 4 h. The resulting solid was ground well and washed with water at 50 °C and alcohol to obtain a yellow powder sample and labeled as PI.

**Characterizations.** The scanning electron microscope (SEM) image was obtained on a JEOL JSM 4800F SEM. Transmission electron microscopy (TEM) images and HRTEM images were carried out on a JEM-2100F microscope at an acceleration voltage of 200 kV. The X-ray diffraction (XRD) patterns were gained on a Bruker AXS D8 Focus with filtered Cu K $\alpha$  radiation ( $\lambda = 1.54056 \text{ \AA}$ ). Fourier transform infrared (FT-IR) spectra were obtained using a Nicolet iS10 FT-IR spectrometer. X-ray photoelectron spectroscopy (XPS) was tested using an ESCALABMKII spectrometer with an Al-K $\alpha$  achromatic X-ray source. N<sub>2</sub> adsorption-desorption isotherms and pore-

---

size distributions were obtained at 77 K using a Quanta chrome Auto sorb iQ apparatus. Prior to the experiments, the samples were degassed under vacuum at 120 °C for 12 h. The UV-vis diffuse reflectance spectra (DRS) measurements were gathered on a UV-2600 UV-vis spectrophotometer (Shimadzu), and BaSO<sub>4</sub> was used for a reference. Photoluminescence (PL) spectra were measured on a VARIAN Cary Eclipse spectrophotometer with the excitation wavelength of 380 nm. The electron paramagnetic resonance (EPR) measurements were carried out on a JEOL JES-FA200 spectrometer. Element analysis is tested on EMGA-930. Thermogravimetric/differential thermal (TG/DTA) analysis in air with a heating rate of 7 °C min<sup>-1</sup>.

**Electrochemical Analysis.** Electrochemical measurements were conducted with a CHI660E Electrochemical Workstation in a standard three electrode cell using a Pt plate, Ag/AgCl electrode and sample deposited fluoride-tin oxide (FTO) as counter electrode, reference electrode and the working electrode, respectively. The electrolyte solution is 0.2 M Na<sub>2</sub>SO<sub>4</sub> aqueous solution. Working electrode manufacturing method is as follows: The 20 mg catalyst is dispersed in 2 ml of ethanol, and then a bulk solution is formed by ultrasound. Transferring suspensions onto a 1×5 cm<sup>2</sup> FTO conductive glass using a spin-coating method. The exposure area of the catalyst is 3 cm<sup>2</sup>. Finally, working electrode is obtained by drying at room temperature. For photocurrent measurement (*i-t* curves), a 300 W (CELHXF300, AULIGHT) Xe lamp was used as the light source and using a CHI700E electrochemistry station for testing in 0.2 M Na<sub>2</sub>SO<sub>4</sub> under visible-light illumination at -0.4 V. The working electrode is irradiated

---

from the back (FTO substrate) to reduce the effect of the experiments. Electrochemical impedance spectra (EIS) was tested using a CHI700E electrochemistry station in 0.2 M Na<sub>2</sub>SO<sub>4</sub> under visible-light illumination with the frequency ranging from 0.01 Hz to 10 kHz at -0.2 V. The EIS data were recorded using a normal three-electrode system, in which samples onto a 1×3 cm<sup>2</sup> FTO glass with an active area of ca. 2.0 cm<sup>2</sup> were prepared as the working electrode, Pt wire as a counter electrode, and Ag/AgCl as a reference electrode.

**Photocatalysis for selective aerobic oxidation of benzylamine.** The photocatalytic reaction was carried out on WATTCAS Parallel Light Reactor (WP-TEC-1020HPL) with 10 W COB LED. 0.2 mmol benzylamine and 5 mL acetonitrile were added into 20 mL quartz tube, 5 mg of catalyst was added for ultrasonic uniform dispersion. The quartz tube is placed under the LED light source of 420-425 nm and reacts for a period of time. After the illumination, the reaction solution was centrifuged and the products in the supernatant were detected by GC-Agilent 7820 chromatography. The chromatographic column was 19091J-413 with a diameter of 30 m × 0.320 mm. The nitrogen flow rate was 6 mL/min and the split ratio was 10:1. We set the temperature of the column box at 80 °C, heat it up to 280 °C at a rate of 66 °C/min, and start to run after keeping it for a period of time.

**Photocatalytic hydrogen production.** The photocatalytic activities of the as-prepared samples were investigated by the water splitting hydrogen production under visible light irradiation. The photocatalytic water decomposition reaction was carried out in a quartz reaction vessel connected to a closed gas circulation and evacuation system. 10

---

mg of as-prepared sample was suspended in 60 mL of aqueous solution containing triethanolamine as the sacrificial electron donor. 3 wt % Pt was loaded onto the surface of the catalyst by an in situ photo deposition method using  $\text{H}_2\text{PtCl}_6 \cdot 6\text{H}_2\text{O}$  as precursor. The suspension was thoroughly degassed and irradiated with a 300 W Xe lamp equipped with a 420 nm cut-off filter. The temperature of the reactant solution was maintained at 283 K by a flow of cooling water during the reaction. The evolved gas was analyzed every 0.5 h by gas chromatography equipped with a thermal conductive detector. For the stability test, the system was evacuated every 3 h and repeated for 4 times. The apparent quantum yield (AQY) for  $\text{H}_2$  evolution was carried out in a quartz reaction vessel connected to a closed gas circulation and evacuation system. 10 mg of as-prepared sample was suspended in 60 mL of aqueous solution containing triethanolamine as the sacrificial electron donor. 3 wt% Pt was loaded onto the surface of the catalyst by an in situ photo deposition method using  $\text{H}_2\text{PtCl}_6 \cdot 6\text{H}_2\text{O}$  as precursor. The suspension was thoroughly degassed and irradiated using 300 W Xe lamp equipped with different band-pass filter ( $400 \pm 20$  nm,  $420 \pm 20$  nm,  $450 \pm 20$  nm, respectively). The spot diameter is  $1 \text{ cm}^2$ . The distance between the light and the reaction liquid surface is about 12 cm. The average intensity of irradiation was measured by Beijing Normal University UV-420 optical power meter. The AQY was calculated based on the following equation:

$$\text{AQY} = \frac{N_e}{N_p} \times 100\% = \frac{2 \times M \times NA \times h \times c}{S \times P \times t \times \lambda} \times 100\%$$

where  $N_e$  is the amount of reaction electrons,  $N_p$  is the incident photons,  $M$  is the

---

amount of  $H_2$  molecule,  $N$  is Avogadro constant,  $h$  is the Planck constant,  $c$  is the speed of light,  $S$  is the irradiation area,  $P$  is the intensity of the irradiation,  $t$  is the photoreaction time, and  $\lambda$  is the wavelength of the monochromatic light.

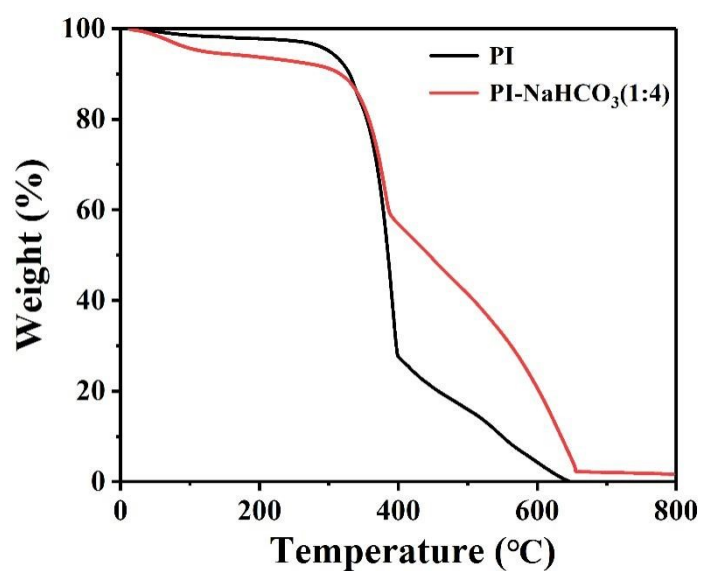

Fig. S1 TGA curve of the PI and PI-NaHCO<sub>3</sub> (1:4).

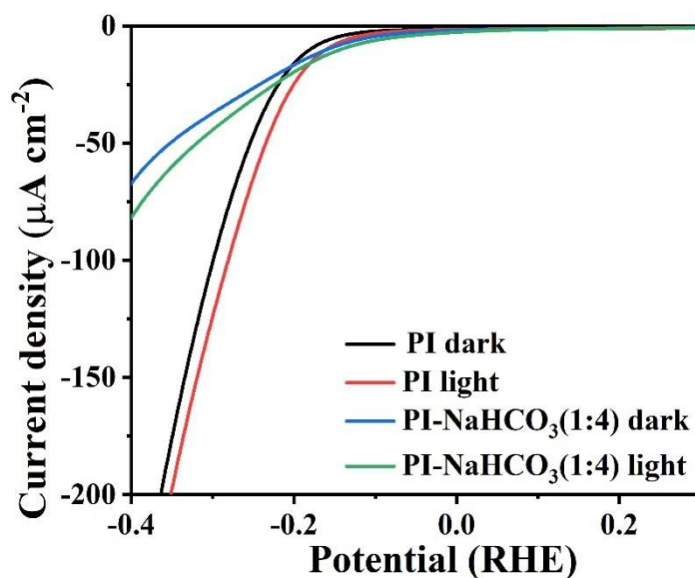

Fig. S2 LSV curves of PI and PI-NaHCO<sub>3</sub> (1:4) under dark and light.

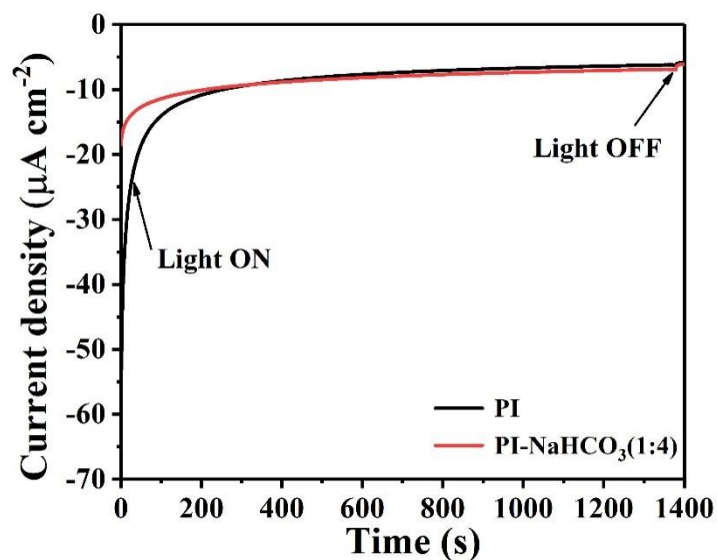

Fig. S3 I-t stability curve of PI and PI-NaHCO<sub>3</sub> (1:4) under visible-light irradiation.

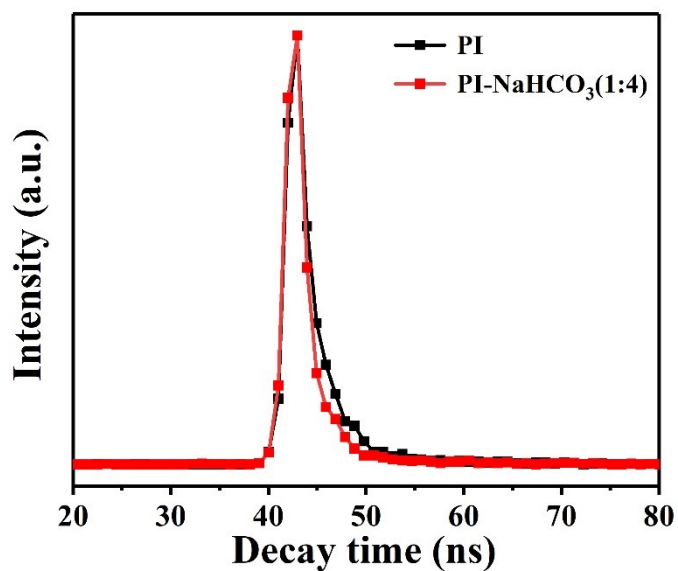

Fig. S4 Time-resolved fluorescence kinetics monitored at the corresponding emission peaks of PI and PI-NaHCO<sub>3</sub> (1:4).

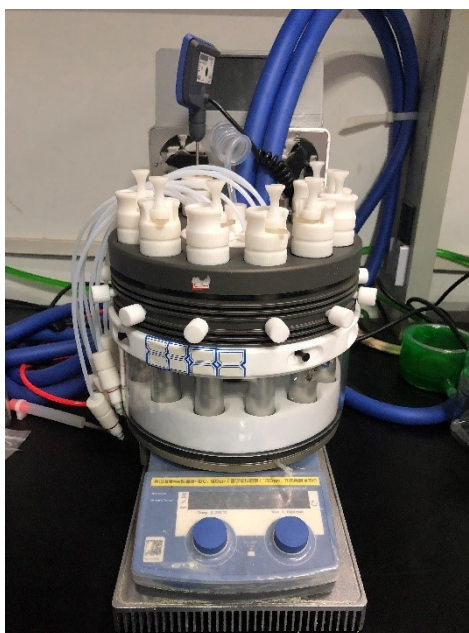

**Fig. S5** Image of reactor for photocatalytic selective oxidation of benzylamine.

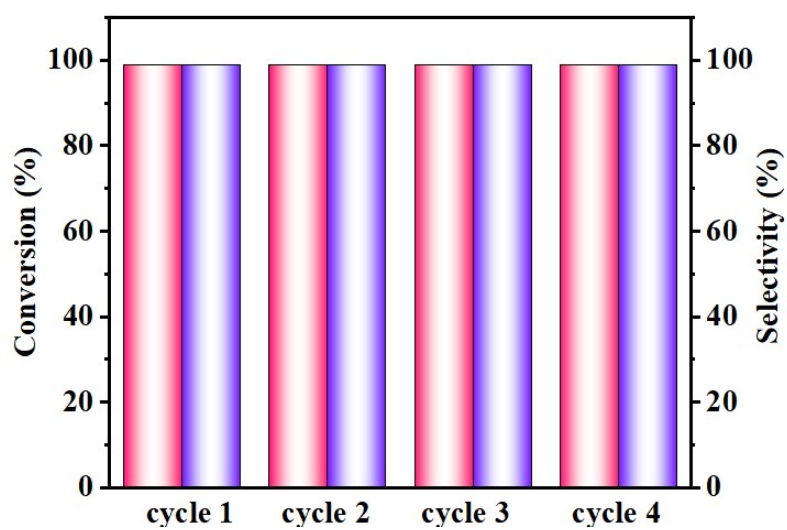

**Fig. S6** The recycling test of PI-NaHCO<sub>3</sub> (1:4) photocatalyst for the LED at 420-425 nm selective aerobic oxidation of benzylamine.



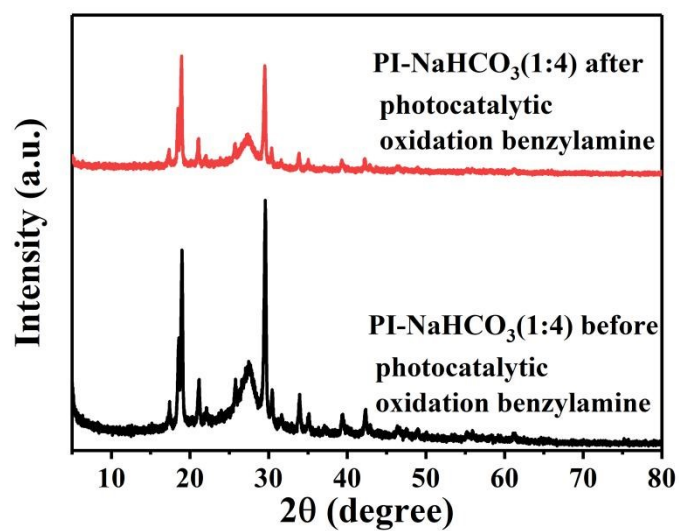

**Fig. S7** The XRD after photocatalytic oxidation of benzylamine by PI-NaHCO<sub>3</sub> (1:4).

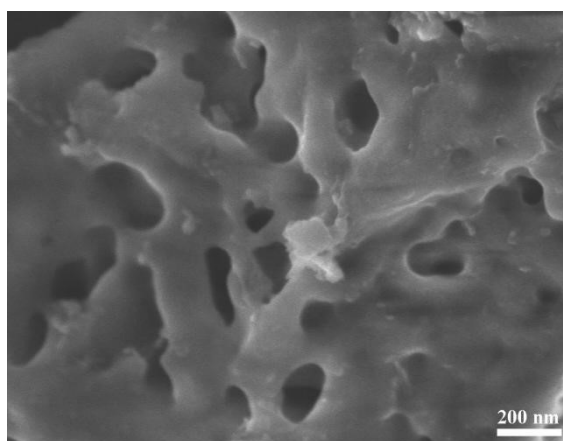

**Fig. S8** The SEM after photocatalytic oxidation of benzylamine by PI-NaHCO<sub>3</sub> (1:4).

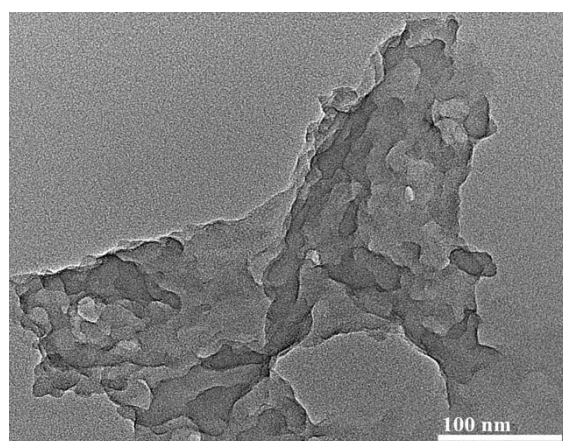

**Fig. S9** The TEM after photocatalytic oxidation of benzylamine by PI-NaHCO<sub>3</sub> (1:4).

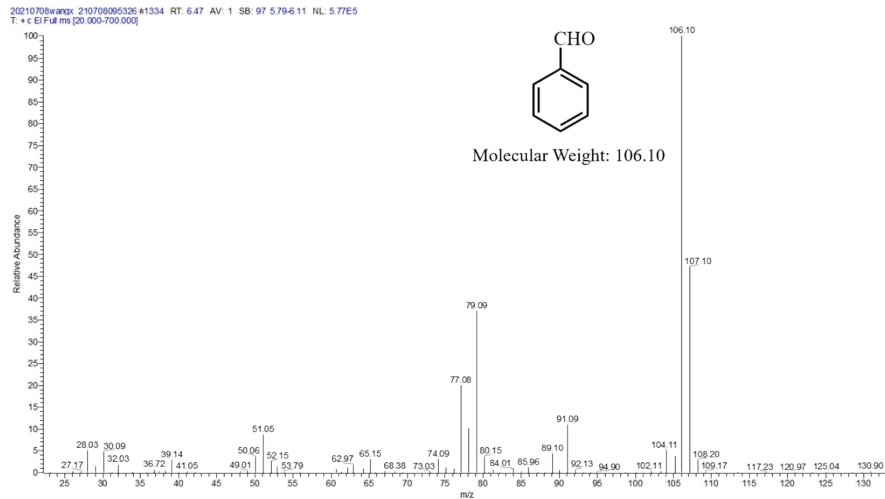

Fig. S10 GC-MS trace of benzaldehyde.

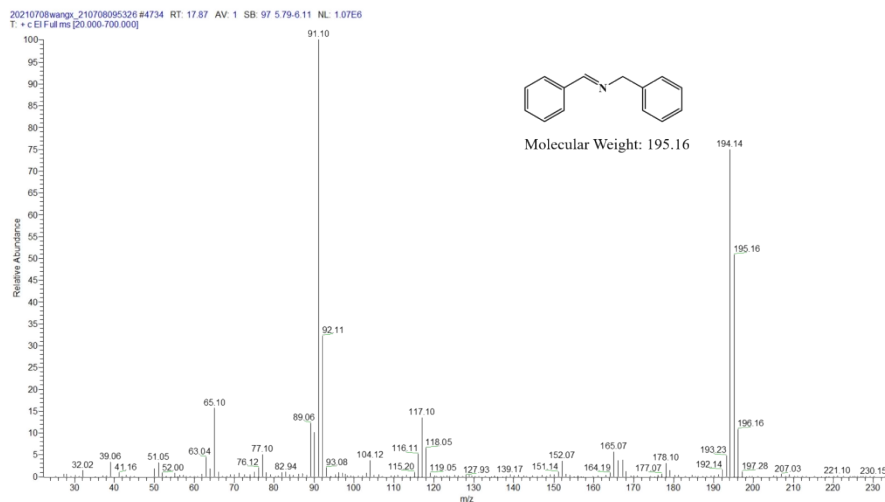

Fig. S11 GC-MS trace of N-benzyl-1-phenylmethanimine.

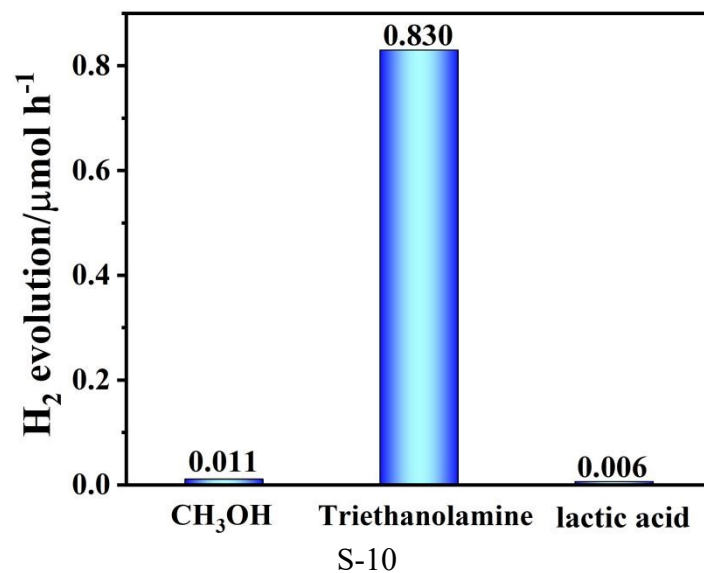

**Fig. S12** Photocatalytic H<sub>2</sub> evolution with PI-NaHCO<sub>3</sub> (1:4) at different sacrificial agents.

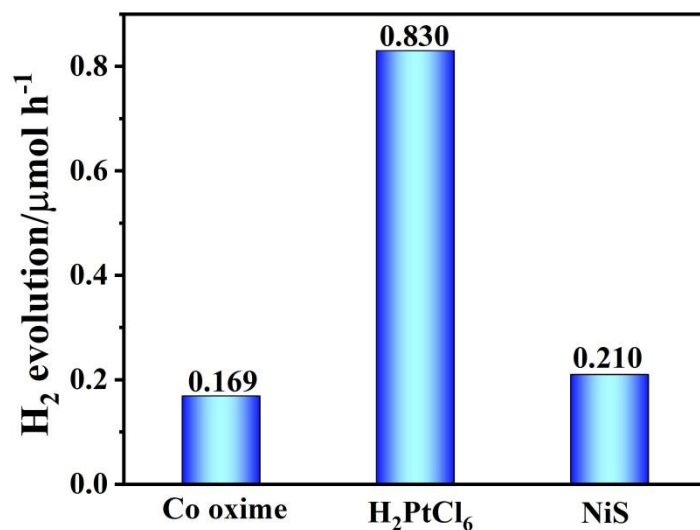

**Fig. S13** Photocatalytic H<sub>2</sub> evolution with PI-NaHCO<sub>3</sub> (1:4) at different cocatalysts.

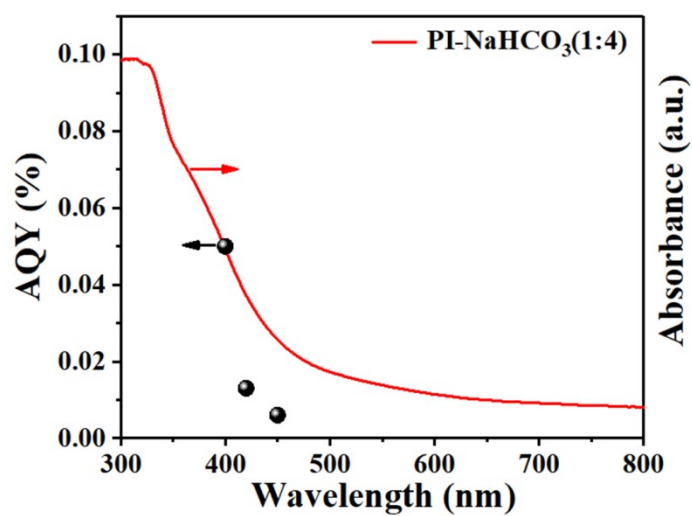

**Fig. S14** The wavelength dependence of apparent quantum yield (AQY) with PI-NaHCO<sub>3</sub> (1:4) at different irradiation wavelengths.

**Table S1.** EDX analysis results of PI and PI-NaHCO<sub>3</sub> (1:4).

| Sample                      | C/at% | N/at% | O/at% |
|-----------------------------|-------|-------|-------|
| PI                          | 37.27 | 42.58 | 20.15 |
| PI-NaHCO <sub>3</sub> (1:4) | 41.02 | 47.00 | 11.98 |

**Table S2.** Elemental analysis results of PI and PI-NaHCO<sub>3</sub> (1:4).

| Sample                      | C/wt%  | N/wt%  | O/wt%  | H/wt% |
|-----------------------------|--------|--------|--------|-------|
| PI                          | 56.366 | 15.001 | 25.624 | 3.009 |
| PI-NaHCO <sub>3</sub> (1:4) | 59.279 | 15.361 | 21.668 | 3.692 |

**Table S3.** The Fluorescence decay lifetimes and their percentages of photoinduced carriers in the PI and PI-NaHCO<sub>3</sub> (1:4).

$$(y=A_1*\exp(-x/\tau_1)+A_2*\exp(-x/\tau_2))$$

| Sample                      | $\tau_1$ (ns) | $\tau_2$ (ns) | A <sub>1</sub> | A <sub>2</sub> | $\tau_{avg}$ (ns) |
|-----------------------------|---------------|---------------|----------------|----------------|-------------------|
| PI                          | 1.3846        | 4.2673        | 6.408          | 0.144          | 1.5716            |
| PI-NaHCO <sub>3</sub> (1:4) | 1.1640        | /             | 7.264          | /              | 1.1640            |

**Table S4.** Photocatalytic oxidation of  $\alpha$ -terpinene over PI and PI-NaHCO<sub>3</sub>.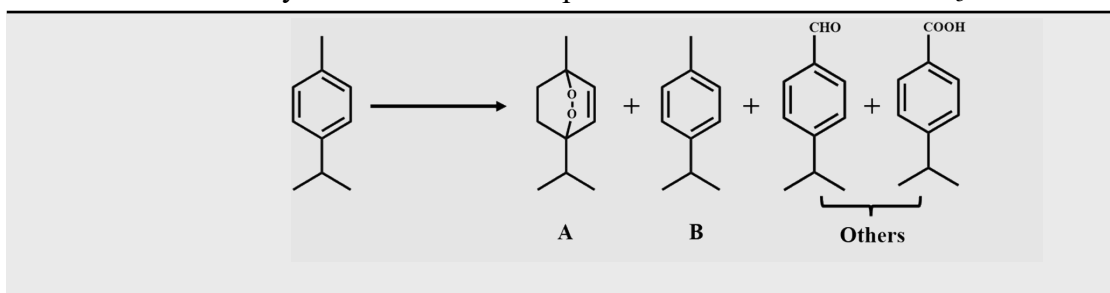

| Entry | Catalyst                    | $\lambda$ (nm) | atmosph<br>ere | Time/<br>h | Conv. <sup>[a]</sup> /<br>% | Sel. <sup>[b]</sup> /% |              |        |
|-------|-----------------------------|----------------|----------------|------------|-----------------------------|------------------------|--------------|--------|
|       |                             |                |                |            |                             | A                      | B            | C      |
|       |                             |                |                |            |                             | ascari<br>dole         | p-<br>cymene | others |
| 1     | /                           | 420            | Air            | 5          | 5.38                        | trace                  | 5.38         | trace  |
| 2     | PI-NaHCO <sub>3</sub> (1:4) | /              | Air            | 5          | trace                       | -                      | -            | -      |
| 3     | PI-NaHCO <sub>3</sub> (1:4) | 420            | Ar             | 5          | 3.44                        | trace                  | 3.44         | trace  |
| 4     | PI                          | 420            | Air            | 5          | 90.73                       | 14.36                  | 71.05        | 5.32   |
| 5     | PI-NaHCO <sub>3</sub> (1:1) | 420            | Air            | 5          | 92.95                       | 27.32                  | 63.43        | 2.20   |
| 6     | PI-NaHCO <sub>3</sub> (1:4) | 420            | Air            | 5          | 100                         | 17.19                  | 79.74        | 3.07   |
| 7     | PI-NaHCO <sub>3</sub> (1:8) | 420            | Air            | 5          | 93.79                       | 13.71                  | 75.12        | 4.96   |

Experimental conditions: 5 mL of acetonitrile, 0.1 mmol of  $\alpha$ -terpinene, PI-NaHCO<sub>3</sub> (1:4) (5.0 mg) and irradiated with LED at 420-425 nm. [a] Conversion; [b] Selectivity.
